# Supplementary material
Source: publisher figshare collection journal article supplement (https://acs.figshare.com/ndownloader/files/4128049)
Supplement: Supplementary file 1 [file 4128049]

# Supporting Information for “Charge transport in mixed organic disorder semiconductors: trapping, scattering, and effective energetic disorder”

## Derivation of equation 6:

Assume that two materials are in the mixed organic semiconductors: material A with a content of  $x$  (mol), a energy level of  $\varepsilon_A$ , a disorder (standard deviation) of  $\sigma_A$  and a density function of  $p(A)$ ; material B with a content of  $1-x$  (mol), a energy level of  $\varepsilon_B$ , a disorder (standard deviation) of  $\sigma_B$  and a density function of  $p(B)$ .

Then the equations below are obtained:

$$\int p(A) d\epsilon = 1, \int p(B) d\epsilon = 1$$

$$\int \epsilon \cdot p(A) d\epsilon = \varepsilon_A, \int \epsilon \cdot p(B) d\epsilon = \varepsilon_B$$

$$\int \epsilon^2 \cdot p(A) d\epsilon = \varepsilon_A^2 + \sigma_A^2, \int \epsilon^2 \cdot p(B) d\epsilon = \varepsilon_B^2 + \sigma_B^2$$

And the density function of the mixed system,  $p_m$ , and the average energy level of the mixed system,  $\varepsilon_m$ , will be

$$p_m = x \cdot p(A) + (1 - x) \cdot p(B) \text{ and } \varepsilon_m = x \cdot \varepsilon_A + (1 - x) \cdot \varepsilon_B.$$

The deviation of the mixed system,  $\sigma_m^2$ , will be

$$\sigma_m^2 = \int (\epsilon - \varepsilon_m)^2 \cdot p_m d\epsilon$$

$$= \int [\epsilon - (x \cdot \epsilon_A + (1-x) \cdot \epsilon_B)]^2 \cdot (x \cdot p(A) + (1-x) \cdot p(B)) d\epsilon = I_A + I_B$$

where  $I_A = \int [\epsilon - (x \cdot \epsilon_A + (1-x) \cdot \epsilon_B)]^2 \cdot x \cdot p(A) d\epsilon$  and

$$I_B = \int [\epsilon - (x \cdot \epsilon_A + (1-x) \cdot \epsilon_B)]^2 \cdot (1-x) \cdot p(B) d\epsilon.$$

$$I_A = \int [\epsilon - (x \cdot \epsilon_A + (1-x) \cdot \epsilon_B)]^2 \cdot x \cdot p(A) d\epsilon$$

$$= \int \epsilon^2 \cdot x \cdot p(A) d\epsilon + \int 2\epsilon \cdot (x \cdot \epsilon_A + (1-x) \cdot \epsilon_B) \cdot x \cdot p(A) d\epsilon \\ + \int (x \cdot \epsilon_A + (1-x) \cdot \epsilon_B)^2 \cdot x \cdot p(A) d\epsilon$$

$$= x \cdot (\epsilon_A^2 + \sigma_A^2) + 2x \cdot (x \cdot \epsilon_A + (1-x) \cdot \epsilon_B) \cdot \epsilon_A + x \cdot (x \cdot \epsilon_A + (1-x) \cdot \epsilon_B)^2$$

$$= x \cdot \sigma_A^2 + x \cdot (1-x)^2 \cdot (\epsilon_A - \epsilon_B)^2.$$

$$\text{Similarly, } I_B = (1-x) \cdot \sigma_B^2 + (1-x) \cdot x^2 \cdot (\epsilon_A - \epsilon_B)^2.$$

$$\text{So we get } \sigma_m^2 = I_A + I_B = x \cdot \sigma_A^2 + x \cdot (1-x) \cdot (\epsilon_A - \epsilon_B)^2 + (1-x) \cdot \sigma_B^2.$$

This equation is valid for any type of DOS.

**Generalization of our conclusion to the TPD hosted system and NPB hosted systems<sup>12,13</sup> reported by So *et al.***

**Table S1.** The critical  $\Delta E$  and the effects of traps and scatters on hole transport characters in TPD hosted system and NPB hosted system.

| Host              | $\mu_h$ (cm <sup>2</sup> /Vs) | $\Delta E_{\text{critical}}$ (eV) | $\sigma_{\text{exp}}$ (meV) | $\lambda$ |              | $\Delta E$          | $\mu_h$ (cm <sup>2</sup> /Vs) | $\sigma_{\text{exp}}$ (meV) <sup>c)</sup> | $\lambda$  |
|-------------------|-------------------------------|-----------------------------------|-----------------------------|-----------|--------------|---------------------|-------------------------------|-------------------------------------------|------------|
| TPD <sup>12</sup> | 7.87×10 <sup>-2 a)</sup>      | 0.20                              | 76                          | 2.1       | TPD: Rubrene | -0.1 (shallow trap) | 3.21×10 <sup>-2</sup>         | 80 (79)                                   | 2.4        |
|                   |                               |                                   |                             |           | TPD:DCM1     | -0.2 (shallow trap) | 4.29×10 <sup>-3</sup>         | 103 (88)                                  | 6          |
| NPB <sup>13</sup> | 6.6×10 <sup>-3 b)</sup>       | 0.23                              | 75                          | 1.3       | NPB:DCM1     | -0.2 (shallow trap) | 1.0×10 <sup>-3</sup>          | 100 (88)                                  | Dispersive |
|                   |                               |                                   |                             |           | NPB:DCM2     | -0.2 (shallow trap) | 1.5×10 <sup>-3</sup>          | 98 (88)                                   | Dispersive |
|                   |                               |                                   |                             |           | NPB:TBu-TBD  | 0.4 (high scatter)  | 4.7×10 <sup>-3</sup>          | 74 (75)                                   | 1.5        |
|                   |                               |                                   |                             |           | NPB:BCP      | 1.0 (high scatter)  | 6.2×10 <sup>-3</sup>          | 77 (75)                                   | 2.0        |
|                   |                               |                                   |                             |           | NPB:CuPc     | -0.3 (deep trap)    | 6.0×10 <sup>-3</sup>          | — (75)                                    | 2.5        |

<sup>a)</sup> Hole mobilities of the TPD system are the zero field mobilities.

<sup>b)</sup> Hole mobilities of the NPB system are under the field of 0.29 MV/cm.

<sup>c)</sup> Data in the brackets are the effective energetic disorders calculated via **equation 6**.

This material is available free of charge via the Internet at <http://pubs.acs.org>.
